# Supplementary material
Source: PubMed Central journal article supplement (PMC4279734)
Supplement: ASN.2013111155_ASN2013111155SupplementaryData.pdf [file ASN.2013111155_ASN2013111155SupplementaryData.pdf]

## Supplementary Materials and methods

**Recruitment of patients and clinical investigation** A total of 69 patients affected by sporadic (*i.e.* not familial), non-syndromic and non-congenital nephrotic syndrome (NS) referred to Meyer Children's Hospital of Florence (Italy) between 2000 and 2013 and who provided informed consent were included in the study (Supplementary Table 1). Only patients affected by NS that did not exhibit extra-renal symptoms, that did not have a familial history of renal disease or of consanguinity, and that did not have a congenital NS were included in this study. Steroid-resistance was defined as failure to achieve remission after 8 weeks of prednisone 60 mg/m<sup>2</sup>/day or 2 mg/kg/day for 4 weeks followed by 40 mg/m<sup>2</sup> or 1.5 mg/kg on alternate days for 4 weeks, according to Kidney Disease: Improving Global Outcomes (KDIGO) guidelines.<sup>1</sup> None of these patients exhibited a phenotype of late-responder to steroid treatment. Complete remission was defined as urine protein:creatinine ratio (uPCR) <200 mg/g or <1+ of protein on urine dipstick for 3 consecutive days; partial remission was defined as proteinuria reduction of 50% or greater from the presenting value and absolute uPCR between 200 and 2,000 mg/g; finally, no remission was defined as failure to reduce urine protein excretion by 50% from baseline or persistent excretion uPCR >2,000 mg/g, according to KDIGO guidelines.<sup>1</sup> On the basis of these criteria, we selected 31 cases of steroid-resistant NS (SRNS), as well as 38 patients with the same clinical phenotype but that were sensitive to steroid treatment. All information about clinical features, disease onset, response to treatment, histologic findings and final outcome were collected retrospectively. Relatives were either included prior to this study or requested to participate after the identification of potentially causative variants in the proband. The study protocol was approved by the local Ethics Committee of the Meyer Children's Hospital and informed written consent was obtained from the parents or legal guardians of each study participant.

**Exon sequencing array design** The probe design was made by Roche NimbleGen Inc. (Roche, Madison, Wisconsin, USA) in a solution based method to capture all coding exons and flanking regions of 46 genes. These genes comprised the 19 known genes responsible for SRNS and 27 candidate genes associated with onset of proteinuria in animal models and expressed in the glomerular filtration barrier (Supplementary Table 2A-B). The probe design comprised a total of 110,884 bases targeting 46 genes consisting of 610 coding exons.

**DNA Sequencing** DNA was extracted from peripheral blood using a QIAamp® DNA Mini Kit (Qiagen, Hilden, Germany). The DNA library were prepared and were hybridized to the exon sequencing array according to the manufacturer's protocol (NimbleGen Arrays User's Guide: 454 Optimized Sequence Capture). To characterize simultaneously different patients, Roche FLX Titanium MID-Adapter oligonucleotides were ligated to the ends of the libraries fragments. The enriched libraries were sequenced using the Roche 454 sequencing FLX platform according to the Roche manufacturer's protocols (emPCR Method Manual-Lib-L LV-Sequencing Method Manual). We obtained an average of 125,742 mapped reads *per* sample, resulting in an evenly distributed average depth of 71X *per* sample. On average, 84% of all bases were covered at least 10X. Among the 610 targeted exons, only 23 exons (4%) were poorly covered, due either to high GC content or the abundant presence of repetitive sequences. The poorly covered regions were successively resequenced by Sanger method. According to the literature,<sup>2</sup> the accuracy of our probe design was 95%.

**Assembly and Variant Calling** Reads were mapped to the reference human genome (UCSC build *hg19*) with the GS Mapper software version 2.6 (Roche Diagnostic, Basel, Switzerland). Variants were annotated with chromosome location, genomic coordinate, reference and variant nucleotide, absolute number and percentage of reads containing variant nucleotide, reference and variant amino acid, coding frame, gene name and overlap with a known single nucleotide polymorphism from dbSNP 135. Coverage statistics and mean depth were extracted from the mapping output files using custom scripts.

**Identification of pathogenic variants** In order to identify genetic variants with a possible pathogenic significance, the following criteria were applied: variants were either non-synonymous, short insertion/deletion or splice-site variants (60 bp splice acceptor, 60 bp splice donor); variants were not included in dbSNP135 unless they were reported in HGMD ([www.hgmd.cf.ac.uk](http://www.hgmd.cf.ac.uk)), were previously demonstrated to alter the function of the mutated protein or represented the second mutated allele in presence of a surely pathogenic variant;<sup>3</sup> variants did not occur in healthy controls within the "1000 Genomes Project" database ([www.1000genomes.org](http://www.1000genomes.org)) at a frequency greater than 5%; variants did not occur within the Kaviar-hg19 database (<http://db.systemsbiology.net/kaviar/>) at a frequency greater than 5%; variants were not found in the "Exome Variant Server" of the "NHLBI Exome Sequencing Project (ESP)"

(<http://evs.gs.washington.edu/EVS/>, release version: v.0.0.10) at a frequency greater than 5%. Subsequently, a systematic classification scheme was applied using a combination of prediction programs. The missense variants were analyzed with the dedicated softwares, PolyPhen (<http://genetics.bwh.harvard.edu/pph2/>), and PMut (<http://mmb.pcb.ub.es/PMut/PMut.jsp>) in order to distinguish potentially damaging variants from those predicted to have neutral effect. Intronic variants localized  $\leq 60$  bp were analyzed with Netgene2 (<http://genes.mit.edu/GENSCAN.html>) and BDGP splice site prediction ([http://www.fruitfly.org/seq\\_tools/splice.html](http://www.fruitfly.org/seq_tools/splice.html) web server). The *in silico* analysis was performed to assess the effect of sequence variants identified on structure and function of respectively encoded proteins. For the missense variants identified we used dedicated prediction tools such as PolyPhen-2 and PMut. PolyPhen-2 (Polymorphism Phenotyping v2) is a software which predicts possible impact of amino acid substitutions on the structure and function of human proteins using straightforward physical and evolutionary comparative considerations. Detailed results of the PolyPhen-2 analysis for a single variant query included:- the strength of the putative damaging effect of the variant classified as probably damaging, possibly damaging, or benign (assessed using the HumDiv-trained predictor, preferred for evaluating rare alleles, dense mapping of regions identified by genome-wide association studies, and analysis of natural selection), -the multiple sequence alignment that displays a fixed 75-residue wide window surrounding the variant position, -3D-protein structure loaded and zoomed into the mutation residue. PMut is a prediction tool based on the use of evolutionary and structure information with residue properties. All these informations are input to a neural network that provides the final prediction on whether the target mutation is pathological, or neutral. The comparison of the aminoacidic sequence of all newly identified variants with those of phylogenetically distant species was performed using CLUSTALW algorithm. On the basis of the results, the variants were classified as potentially pathogenic variants, variants of unknown clinical significance, or benign variants, in accordance with the interpretation guidelines of the American College of Medical Genetics and Genomics (ACMG).<sup>4-6</sup>

**Sanger sequencing** A total of 17 potentially pathogenic variants detected by 454 FLX analyzer were selected and confirmed by Sanger sequencing (Supplementary Table 4). Parental samples, if available, were also analyzed to determine whether the mutated allele had been transmitted.

**Immunofluorescence and Confocal Microscopy** Confocal microscopy was performed on 5- $\mu$ m sections of frozen renal biopsies,<sup>7</sup> using a Leica TCS SP5-II laser confocal microscope (Leica, Milan, Italy). The anti-podocin pAb (Abcam, Cambridge, UK) was used as primary antibody and Alexa Fluor goat anti-rabbit 488 was used as secondary antibody (Invitrogen). For the detection of nuclei, staining of cells with To-pro-3 (Molecular Probes from Invitrogen) was performed.

**Statistical analysis** Statistical analysis was performed using SPSS software (SPSS, Inc., Evanston, IL). Frequencies between groups were compared by  $\chi^2$  test, applying Yate's correction when appropriate. Between-group comparisons were made by means of Student t test for unpaired data or Mann–Whitney U-test owing to normal or nonparametric distribution. A p-value <0.05 was considered as statistically significant.

| Patient | Type | Age at onset | Gender | Ethnicity  | Lenght of Follow-up | Time to ESRD | Age at Tx           |
|---------|------|--------------|--------|------------|---------------------|--------------|---------------------|
| Case 1  | SRNS | 3 yr         | M      | Caucasian  | 3 yr, 5 m           | no           | no                  |
| Case 2  | SRNS | 4 m          | F      | Caucasian  | 2 yr, 2 m           | no           | no                  |
| Case 3  | SRNS | 1 yr, 2 m    | M      | Caucasian  | 3 yr, 11 m          | 4 yr, 8 m    | no                  |
| Case 4  | SRNS | 6 yr, 4 m    | M      | Caucasian  | 2 yr, 3 m           | no           | no                  |
| Case 5  | SRNS | 5 yr         | F      | Caucasian  | 10 yr               | no           | no                  |
| Case 6  | SRNS | 18 m         | F      | Caucasian  | 20 yr, 6 m          | 18 m         | I:2 yr, 6 m II:8 yr |
| Case 7  | SRNS | 3 m          | F      | Caucasian  | 11 yr               | 3 yr         | 4 yr                |
| Case 8  | SRNS | 7 yr, 7 m    | F      | Caucasian  | 6 yr, 5 m           | 8 yr, 9 m    | 11 yr, 11 m         |
| Case 9  | SRNS | 3 yr, 8 m    | F      | Caucasian  | 9 m                 | yes          | no                  |
| Case 10 | SRNS | 7 yr, 5 m    | M      | Tunisian   | 1 yr, 5 m           | no           | no                  |
| Case 11 | SRNS | 6 yr         | M      | Caucasian  | 5 yr, 8 m           | no           | no                  |
| Case 12 | SRNS | 9 yr         | M      | Brazilian  | 7 yr, 1 m           | no           | no                  |
| Case 13 | SRNS | 4 yr         | F      | Caucasian  | 4 yr, 5 m           | no           | no                  |
| Case 14 | SRNS | 5 yr, 5 m    | F      | Caucasian  | 15 yr, 3 m          | 16 yr, 6 m   | 19 yr, 7 m          |
| Case 15 | SRNS | 2 yr, 3 m    | M      | Caucasian  | 8 yr, 11 m          | 11 yr        | no                  |
| Case 16 | SRNS | 5 yr         | M      | Caucasian  | 6 yr                | no           | no                  |
| Case 17 | SRNS | 9 yr         | F      | Caucasian  | 7 yr                | no           | no                  |
| Case 18 | SRNS | 12 yr        | M      | Caucasian  | 9 yr                | 15 yr        | 17 yr               |
| Case 19 | SRNS | 2 yr         | F      | Caucasian  | 16 yr               | no           | no                  |
| Case 20 | SRNS | 8 m          | F      | Moroccan   | 4 yr, 4 m           | 1 yr, 9 m    | 2 yr, 6 m           |
| Case 21 | SRNS | 2 yr, 6 m    | F      | Caucasian  | 4 yr, 6 m           | no           | no                  |
| Case 22 | SRNS | 2 yr, 6 m    | F      | Caucasian  | 6 yr, 7 m           | 6 yr, 4 m    | no                  |
| Case 23 | SRNS | 3 yr, 5 m    | F      | Caucasian  | 13 yr               | 5 yr, 6 m    | 5 yr, 9 m           |
| Case 24 | SRNS | 2 yr, 8 m    | M      | Caucasian  | 4 yr                | no           | no                  |
| Case 25 | SRNS | 13 yr        | F      | Caucasian  | 7 yr                | 15 yr        | 15 yr               |
| Case 26 | SRNS | 1 yr, 8 m    | M      | Caucasian  | 3 yr, 1 m           | no           | no                  |
| Case 27 | SRNS | 4 yr, 2 m    | M      | Caucasian  | 11 yr, 4 m          | no           | no                  |
| Case 28 | SRNS | 13 yr, 11 m  | M      | Caucasian  | 6 yr, 6 m           | no           | no                  |
| Case 29 | SRNS | 13 yr, 8 m   | F      | Caucasian  | 7 yr                | no           | no                  |
| Case 30 | SRNS | 15 yr        | M      | Caucasian  | 4 yr, 6 m           | no           | no                  |
| Case 31 | SRNS | 9 yr, 6 m    | F      | Caucasian  | 1 yr                | no           | no                  |
| Case 32 | SSNS | 4 yr, 5 m    | F      | Caucasian  | 7 yr, 7 m           | no           | no                  |
| Case 33 | SSNS | 7 yr, 8 m    | M      | Caucasian  | 7 yr, 3 m           | no           | no                  |
| Case 34 | SSNS | 16 m         | F      | Caucasian  | 7 yr, 8 m           | no           | no                  |
| Case 35 | SSNS | 3 yr, 3 m    | F      | Caucasian  | 7 yr, 4 m           | no           | no                  |
| Case 36 | SSNS | 3 yr, 2 m    | F      | Moroccan   | 11 yr, 8 m          | no           | no                  |
| Case 37 | SSNS | 5 yr, 2 m    | M      | Caucasian  | 4 yr, 7 m           | no           | no                  |
| Case 38 | SSNS | 2 yr, 9 m    | F      | Caucasian  | 2 yr, 6 m           | no           | no                  |
| Case 39 | SSNS | 4 yr         | M      | Moroccan   | 2 yr, 3 m           | no           | no                  |
| Case 40 | SSNS | 3 yr, 5 m    | F      | Caucasian  | 7 yr, 4 m           | no           | no                  |
| Case 41 | SSNS | 3 yr, 5 m    | M      | Caucasian  | 3 yr, 7 m           | no           | no                  |
| Case 42 | SSNS | 6 yr, 5 m    | M      | Caucasian  | 11 m                | no           | no                  |
| Case 43 | SSNS | 11 yr, 6 m   | M      | Caucasian  | 4 yr, 10 m          | no           | no                  |
| Case 44 | SSNS | 3 yr         | F      | Chinese    | 9 yr, 11 m          | no           | no                  |
| Case 45 | SSNS | 10 yr, 3 m   | M      | Chinese    | 5 yr, 7 m           | no           | no                  |
| Case 46 | SSNS | 2 yr, 1 m    | M      | Caucasian  | 4 yr, 5 m           | no           | no                  |
| Case 47 | SSNS | 8 yr, 8 m    | M      | Albanian   | 7 yr, 5 m           | no           | no                  |
| Case 48 | SSNS | 5 yr, 7 m    | M      | Caucasian  | 9 m                 | no           | no                  |
| Case 49 | SSNS | 1 yr, 9 m    | M      | Caucasian  | 8 m                 | no           | no                  |
| Case 50 | SSNS | 2 yr         | F      | Caucasian  | 5 yr, 9 m           | no           | no                  |
| Case 51 | SSNS | 4 yr, 5 m    | M      | Indian     | 8 yr, 1 m           | no           | no                  |
| Case 52 | SSNS | 2 yr, 9 m    | F      | Caucasian  | 3 yr, 4 m           | no           | no                  |
| Case 53 | SSNS | 7 ys, 5 m    | F      | Senegalese | 1 yr,               | no           | no                  |

|         |      |             |   |             |            |    |    |
|---------|------|-------------|---|-------------|------------|----|----|
| Case 54 | SSNS | 10 yr, 11 m | F | CapeVerdean | 6 m        | no | no |
| Case 55 | SSNS | 3 yr, 4 m   | M | Caucasian   | 2 yr, 8 m  | no | no |
| Case 56 | SSNS | 3 yr, 6 m   | F | Caucasian   | 2 yr, 9 m  | no | no |
| Case 57 | SSNS | 2 yr, 11 m  | M | Caucasian   | 1 yr, 4 m  | no | no |
| Case 58 | SSNS | 10 yr       | M | Caucasian   | 10 m       | no | no |
| Case 59 | SSNS | 2 yr, 6 m   | M | Macedonian  | 13 yr, 2 m | no | no |
| Case 60 | SSNS | 3 yr, 2 m   | F | Caucasian   | 8 yr, 9 m  | no | no |
| Case 61 | SSNS | 9 yr, 2 m   | M | Caucasian   | 7 yr       | no | no |
| Case 62 | SSNS | 2 yr, 1 m   | F | Caucasian   | 1 yr, 5 m  | no | no |
| Case 63 | SSNS | 2 yr, 9 m   | M | Caucasian   | 2 yr       | no | no |
| Case 64 | SSNS | 5 yr, 11 m  | M | Caucasian   | 2 yr, 3 m  | no | no |
| Case 65 | SSNS | 4 yr, 5 m   | M | Chinese     | 10 m       | no | no |
| Case 66 | SSNS | 3 yr, 2 m   | M | Caucasian   | 2 yr, 8 m  | no | no |
| Case 67 | SSNS | 4 yr, 11 m  | M | Caucasian   | 3 m        | no | no |
| Case 68 | SSNS | 2 yr, 7 m   | M | Caucasian   | 2 yr, 7 m  | no | no |
| Case 69 | SSNS | 4 yr, 1 m   | M | Caucasian   | 4 yr       | no | no |

**Supplementary Table 1. Clinical profile of patients.** SRNS, steroid-resistant nephrotic syndrome; SSNS, steroid-sensitive nephrotic syndrome; ESRD, end-stage renal disease; Tx, transplant; yr, years; m, months; M, male; F, female.

| Gene            | Protein                                        | Locus                     | Exons | RefSeq       | Reference |
|-----------------|------------------------------------------------|---------------------------|-------|--------------|-----------|
| <i>WT1</i>      | Wilms tumor                                    | chr11:32409325-32457087   | 10    | NM_024426    | 8         |
| <i>LMX1B</i>    | LIM homeobox transcription factor 1, beta      | chr9:129376748-129463311  | 8     | NM_002316    | 9-10      |
| <i>NPHS1</i>    | nephrin                                        | chr19:36316274-36342739   | 29    | NM_004646    | 11        |
| <i>NPHS2</i>    | podocin                                        | chr1:179519677-179545084  | 8     | NM_014625    | 12        |
| <i>CD2AP</i>    | CD2-associated protein                         | chr6:47445525-47594994    | 18    | NM_012120    | 13        |
| <i>ACTN4</i>    | actinin, alpha 4                               | chr19:39138327-39221170   | 21    | NM_004924    | 14-15     |
| <i>INF2</i>     | inverted formin 2                              | chr14:105155943-105185947 | 23    | NM_022489    | 16        |
| <i>ITGA3</i>    | integrin alpha 3                               | chr17:48133340-48167848   | 26    | NM_002204    | 17        |
| <i>TRPC6</i>    | transient receptor potential cation channel, 6 | chr11:101322296-101454659 | 13    | NM_004621    | 18        |
| <i>LAMB2</i>    | laminin, beta 2                                | chr3:49158548-49170599    | 33    | NM_002292    | 19        |
| <i>PLCE1</i>    | phospholipase C, epsilon 1                     | chr10:95753746-96088146   | 32    | NM_016341    | 20        |
| <i>SCARB2</i>   | scavenger receptor class B, member 2           | chr4:77079894-77135035    | 12    | NM_005506    | 21        |
| <i>CoQ2</i>     | para-hydroxybenzoate-polyprenyltransferase,    | chr4:84184979-84205964    | 7     | NM_015697    | 22        |
| <i>PDSS2</i>    | prenyl diphosphate synthase, subunit 2         | chr6:107473761-107780779  | 8     | NM_020381    | 23        |
| <i>SMARCA11</i> | SWI/SNF-related matrix-associated              | chr2:217277473-217347772  | 18    | NM_001127207 | 24        |
| <i>ZMPSTE24</i> | zinc metallo-peptidase STE24                   | chr1:40723733-40759855    | 10    | NM_005857    | 25        |
| <i>MYH9</i>     | myosin, heavy polypeptide 9, non-muscle        | chr22:36677324-36784063   | 42    | NM_002473    | 26        |
| <i>PTPRO</i>    | receptor-type protein tyrosine phosphatase O   | chr12:15475487-15750335   | 27    | NM_030667    | 27        |
| <i>MYO1E</i>    | myosin IE                                      | chr15:59428564-59665071   | 28    | NM_004998    | 28        |

**Supplementary Table 2A.** List of known genes responsible for nephrotic syndrome included in the sequencing array.

| Gene            | Protein                                                                           | Locus                     | Exons | RefSeq       | Reference |
|-----------------|-----------------------------------------------------------------------------------|---------------------------|-------|--------------|-----------|
| <i>WTIP</i>     | Wilms tumor 1 interacting protein                                                 | chr19:34972880-34992084   | 10    | NM_001080436 | 29        |
| <i>BASP1</i>    | brain abundant, membrane attached signal protein                                  | chr5:17217750-17276935    | 2     | NM_006317    | 30        |
| <i>PAX2</i>     | paired box protein 2                                                              | chr10:102505468-102589697 | 10    | NM_003990    | 31        |
| <i>LDB1</i>     | LIM domain binding 1                                                              | chr10:103867327-103880210 | 11    | NM_001113407 | 32        |
| <i>TCF21</i>    | transcription factor 21                                                           | chr6:134210259-134213391  | 2     | NM_003206    | 33-34     |
| <i>MAFB</i>     | transcription factor MAFB                                                         | chr20:39314519-39317876   | 1     | NM_005461    | 35        |
| <i>FOXC2</i>    | forkhead box C2                                                                   | chr16:86600857-86602535   | 1     | NM_005251    | 36        |
| <i>CITED2</i>   | Cbp/p300-interacting transactivator, with Glu/Asp-rich carboxy-terminal domain, 2 | chr6:139693397-139695785  | 2     | NM_006079    | 37        |
| <i>NF-Kb1</i>   | nuclear factor kappa-B, subunit 1                                                 | chr4:103422486-103538458  | 24    | NM_003998    | 38        |
| <i>SMAD7</i>    | SMAD family member 7                                                              | chr18:46446224-46477081   | 4     | NM_005904    | 38        |
| <i>TGFB</i>     | transforming growth factor, beta 1                                                | chr19:41836651-41859816   | 7     | NM_000660    | 38-39     |
| <i>ZHX1</i>     | zinc fingers and homeoboxes 1                                                     | chr8:124260697-124286547  | 4     | NM_007222    | 40        |
| <i>ZHX2</i>     | zinc fingers and homeoboxes 2                                                     | chr8:123793901-123986755  | 4     | NM_014943    | 40        |
| <i>ZHX3</i>     | zinc fingers and homeoboxes 3                                                     | chr20:39807089-39928739   | 4     | NM_015035    | 40        |
| <i>RBPJ-K</i>   | recombining binding protein suppressor of hairless                                | chr4:26322448-26433278    | 11    | NM_203284    | 41        |
| <i>SYNPO</i>    | synaptopodin                                                                      | chr5:150020220-150038792  | 3     | NM_007286    | 42        |
| <i>PALLD</i>    | palladin                                                                          | chr4:169418217-169849607  | 21    | NM_016081    | 43        |
| <i>ITGB1BP1</i> | integrin cytoplasmic domain-associated protein 1                                  | chr2:9545823-9563643      | 7     | NM_004763    | 44-45     |
| <i>CTSL1</i>    | cathepsin L1                                                                      | chr9:90340974-90346382    | 8     | NM_145918    | 46        |

|                |                            |                           |    |           |    |
|----------------|----------------------------|---------------------------|----|-----------|----|
| <i>KIRREL</i>  | kin of IRRE like protein1  | chr1:157963063-158065842  | 15 | NM_018240 | 47 |
| <i>KIRREL3</i> | kin of IRRE like protein 3 | chr11:126293397-126870766 | 16 | NM_032531 | 48 |
| <i>PODXL</i>   | podocalyxin                | chr7:131185023-131241376  | 8  | NM_005397 | 49 |
| <i>CoQ10A</i>  | coenzyme Q10 homolog A     | chr12:56660642-56664748   | 5  | NM_144576 | 50 |
| <i>CoQ10B</i>  | coenzyme Q10 homolog B     | chr2:198318231-198339851  | 5  | NM_025147 | 50 |
| <i>CD151</i>   | CD151 antigen              | chr11:832952-838834       | 9  | NM_004357 | 51 |
| <i>LMNA</i>    | lamin A                    | chr1:156084461-156109878  | 12 | NM_170707 | 52 |
| <i>NOTCH1</i>  | notch1                     | chr9:139388897-139440238  | 34 | NM_017617 | 53 |

**Supplementary Table 2B.** List of candidate genes associated with onset of proteinuria in animal models and expressed in the glomerular filtration barrier, included in the sequencing array.

| Patient | Gene         | Pathol | Type | Immunosuppressive drugs |   |    |   |     |   |     |   | RAS-Is | R | Remission |
|---------|--------------|--------|------|-------------------------|---|----|---|-----|---|-----|---|--------|---|-----------|
|         |              |        |      | CnIs                    | R | CF | R | MMF | R | Rtx | R |        |   |           |
| Case 1  | <i>NPHS2</i> | MCD    | SRNS | 0                       |   | 1  | 0 | 0   |   | 0   |   | 1      | 1 | C         |
| Case 2  | <i>NPHS2</i> | no     | SRNS | 0                       |   | 0  |   | 0   |   | 0   |   | 1      | 0 | N         |
| Case 3  | <i>NPHS2</i> | FSGS   | SRNS | 0                       |   | 0  |   | 0   |   | 0   |   | 1      | 0 | N         |
| Case 4  | <i>NPHS2</i> | FSGS   | SRNS | 0                       |   | 0  |   | 0   |   | 0   |   | 1      | 1 | P         |
| Case 5  | <i>NPHS2</i> | FSGS   | SRNS | 1                       | 0 | 1  | 0 | 0   |   | 0   |   | 1      | 0 | N         |
| Case 6  | <i>PLCE1</i> | FSGS   | SRNS | 0                       |   | 1  | 0 | 0   |   | 0   |   | 1      | 0 | N         |
| Case 7  | <i>PLCE1</i> | DMS    | SRNS | 0                       |   | 0  |   | 0   |   | 0   |   | 1      | 0 | N         |
| Case 8  | <i>ACTN4</i> | FSGS   | SRNS | 1                       | 0 | 1  | 0 | 0   |   | 0   |   | 1      | 0 | N         |
| Case 9  | <i>ACTN4</i> | FSGS   | SRNS | 1                       | 0 | 0  |   | 0   |   | 0   |   | 0      |   | N         |
| Case 10 | <i>LMX1B</i> | MCD    | SRNS | 1                       | 0 | 0  |   | 0   |   | 0   |   | 1      | 1 | P         |
| Case 11 | none         | FSGS   | SRNS | 1                       | 1 | 1  | 0 | 1   | 0 | 1   | 1 | 1      | 1 | P         |
| Case 12 | none         | MCD    | SRNS | 1                       | 1 | 1  | 0 | 0   |   | 0   |   | 0      |   | C         |
| Case 13 | none         | FSGS   | SRNS | 0                       |   | 1  | 1 | 0   |   | 0   |   | 1      | 1 | C         |
| Case 14 | none         | FSGS   | SRNS | 1                       | 0 | 1  | 0 | 0   |   | 1   | 0 | 1      | 0 | N         |
| Case 15 | none         | FSGS   | SRNS | 1                       | 0 | 1  | 0 | 1   | 0 | 0   | 0 | 1      | 0 | N         |
| Case 16 | none         | MCD    | SRNS | 1                       | 1 | 0  |   | 0   |   | 0   |   | 0      |   | C         |
| Case 17 | none         | FSGS   | SRNS | 1                       | 0 | 1  | 0 | 0   |   | 1   | 0 | 1      | 0 | N         |
| Case 18 | none         | FSGS   | SRNS | 1                       | 0 | 1  | 0 | 0   |   | 0   |   | 1      | 0 | N         |
| Case 19 | none         | FSGS   | SRNS | 0                       |   | 0  |   | 0   |   | 0   |   | 1      | 0 | N         |
| Case 20 | none         | DMS    | SRNS | 0                       |   | 0  |   | 0   |   | 0   |   | 1      | 0 | N         |
| Case 21 | none         | FSGS   | SRNS | 1                       | 0 | 1  | Ø | 0   |   | 0   |   | 1      | 1 | C         |
| Case 22 | none         | MCD    | SRNS | 1                       | 1 | 0  |   | 1   | 0 | 1   | 0 | 1      | 0 | N         |
| Case 23 | none         | FSGS   | SRNS | 1                       | 0 | 1  | 0 | 0   |   | 0   |   | 1      | 0 | N         |
| Case 24 | none         | FSGS   | SRNS | 0                       |   | 1  | 0 | 1   | 0 | 0   |   | 1      | 1 | P         |
| Case 25 | none         | FSGS   | SRNS | 0                       |   | 0  |   | 0   |   | 1   | 0 | 1      | 0 | N         |
| Case 26 | none         | no     | SRNS | 1                       | 0 | 0  |   | 0   |   | 1   | 1 | 0      |   | C         |
| Case 27 | none         | FSGS   | SRNS | 1                       | 1 | 1  | 0 | 1   | 1 | 0   |   | 1      | 1 | C         |
| Case 28 | none         | DMS    | SRNS | 1                       | 1 | 1  | 0 | 0   |   | 0   |   | 1      | 1 | P         |
| Case 29 | none         | MCD    | SRNS | 1                       | 1 | 0  |   | 0   |   | 0   |   | 0      | 0 | C         |
| Case 30 | none         | no     | SRNS | 0                       |   | 1  | 1 | 0   |   | 0   |   | 1      | 1 | C         |
| Case 31 | none         | DMS    | SRNS | 1                       | 1 | 0  |   | 0   |   | 0   |   | 1      | 1 | P         |
| Case 32 | none         | no     | SSNS | 1                       | 1 | 0  |   | 0   |   | 0   |   | 0      |   | C         |
| Case 33 | none         | no     | SSNS | 1                       | 1 | 0  |   | 1   | 1 | 0   |   | 0      |   | C         |
| Case 34 | none         | no     | SSNS | 0                       |   | 0  |   | 0   |   | 0   |   | 0      |   | C         |
| Case 35 | none         | no     | SSNS | 1                       | 1 | 0  |   | 1   | Ø | 0   |   | 0      |   | C         |
| Case 36 | none         | no     | SSNS | 1                       | 1 | 1  | Ø | 1   | 1 | 1   | — | 0      |   | C         |
| Case 37 | none         | no     | SSNS | 0                       |   | 0  |   | 0   |   | 0   |   | 0      |   | C         |
| Case 38 | none         | no     | SSNS | 0                       |   | 0  |   | 0   |   | 0   |   | 0      |   | C         |
| Case 39 | none         | no     | SSNS | 1                       | — | 0  |   | 0   |   | 0   |   | 0      |   | C         |
| Case 40 | none         | no     | SSNS | 0                       |   | 0  |   | 0   |   | 0   |   | 0      |   | C         |
| Case 41 | none         | no     | SSNS | 1                       | 1 | 1  | 1 | 0   |   | 0   |   | 0      |   | C         |
| Case 42 | none         | no     | SSNS | 1                       | — | 0  |   | 0   |   | 0   |   | 0      |   | C         |
| Case 43 | none         | no     | SSNS | 1                       | 0 | 1  | 1 | 1   | 0 | 1   | — | 0      |   | C         |
| Case 44 | none         | no     | SSNS | 1                       | 1 | 0  |   | 0   |   | 0   |   | 0      |   | C         |
| Case 45 | none         | no     | SSNS | 1                       | 0 | 1  | 1 | 1   | 1 | 0   |   | 0      |   | C         |
| Case 46 | none         | no     | SSNS | 0                       |   | 0  |   | 0   |   | 1   | — | 0      |   | C         |
| Case 47 | none         | no     | SSNS | 1                       | 1 | 0  |   | 0   |   | 1   | — | 0      |   | C         |
| Case 48 | none         | no     | SSNS | 0                       |   | 0  |   | 0   |   | 0   |   | 0      |   | C         |
| Case 49 | none         | no     | SSNS | 0                       |   | 0  |   | 0   |   | 0   |   | 0      |   | C         |
| Case 50 | none         | no     | SSNS | 1                       | 1 | 0  |   | 0   |   | 0   |   | 0      |   | C         |
| Case 51 | none         | no     | SSNS | 0                       |   | 0  |   | 0   |   | 0   |   | 0      |   | C         |

|         |      |    |      |   |   |   |   |   |  |   |  |   |  |   |
|---------|------|----|------|---|---|---|---|---|--|---|--|---|--|---|
| Case 52 | none | no | SSNS | 1 | 1 | 0 |   | 0 |  | 0 |  | 0 |  | C |
| Case 53 | none | no | SSNS | 0 |   | 0 |   | 0 |  | 0 |  | 0 |  | C |
| Case 54 | none | no | SSNS | 0 |   | 0 |   | 0 |  | 0 |  | 0 |  | C |
| Case 55 | none | no | SSNS | 0 |   | 0 |   | 0 |  | 0 |  | 0 |  | C |
| Case 56 | none | no | SSNS | 1 | 1 | 0 |   | 0 |  | 0 |  | 0 |  | C |
| Case 57 | none | no | SSNS | 0 |   | 1 | — | 0 |  | 0 |  | 0 |  | C |
| Case 58 | none | no | SSNS | 0 |   | 0 |   | 0 |  | 0 |  | 0 |  | C |
| Case 59 | none | no | SSNS | 1 | 1 | 1 | 1 | 0 |  | 0 |  | 0 |  | C |
| Case 60 | none | no | SSNS | 1 | 1 | 1 | 1 | 0 |  | 0 |  | 0 |  | C |
| Case 61 | none | no | SSNS | 1 | 1 | 0 |   | 0 |  | 0 |  | 0 |  | C |
| Case 62 | none | no | SSNS | 1 | 1 | 0 |   | 0 |  | 0 |  | 0 |  | C |
| Case 63 | none | no | SSNS | 0 |   | 1 | 1 | 0 |  | 0 |  | 0 |  | C |
| Case 64 | none | no | SSNS | 0 |   | 1 | 1 | 0 |  | 0 |  | 0 |  | C |
| Case 65 | none | no | SSNS | 1 | 1 | 0 |   | 0 |  | 0 |  | 0 |  | C |
| Case 66 | none | no | SSNS | 0 |   | 1 | 1 | 0 |  | 0 |  | 0 |  | C |
| Case 67 | none | no | SSNS | 0 |   | 0 |   | 0 |  | 0 |  | 0 |  | C |
| Case 68 | none | no | SSNS | 0 |   | 0 |   | 0 |  | 0 |  | 0 |  | C |
| Case 69 | none | no | SSNS | 0 |   | 0 |   | 0 |  | 0 |  | 0 |  | C |

**Supplementary Table 3. Genotype in relation to pathology, response to treatment and outcome in patients affected by SRNS and SSNS.** Pathol, pathology; FSGS, focal segmental glomerulosclerosis; MCD, minimal-change disease; DMS, diffuse mesangial sclerosis; SRNS, steroid-resistant nephrotic syndrome; SSNS, steroid-sensitive nephrotic syndrome; CnIs, calcineurin inhibitors; CF, cyclophosphamide; MMF, mycophenolate mofetil; Rtx, rituximab; RAS-Is, renin-angiotensin system inhibitors; R, type of response; 1, response; 0, no response; —, response not evaluable because the drug has been started too recently; Ø, suspension of the drug because of the onset of major side effects; C, complete remission; P, partial remission; N, no remission.

| Gene              | Forward                           | Reverse                      |
|-------------------|-----------------------------------|------------------------------|
| <i>ACTN4 ex4</i>  | 5'TAACGACCTTCTGCCCTCTG-3'         | 5'-CAGGAAGAGGCTTGAAGCAT-3'   |
| <i>ACTN4 ex8</i>  | 5'-TCACTCTGCAGGTCCCTCTC-3'        | 5'-CGTCTGCAAGAGAAATGAGG-3'   |
| <i>PLCE1 ex6</i>  | 5'GAATTTAGGCTCCTTGCTGTAAAC-3'     | 5'-GACAGGGCCTGATGAGACAG -3'  |
| <i>PLCE1ex7</i>   | 5'-TCCAGGAAAAGCTCCTTGAA-3'        | 5'-GTGGCAGGTTTTGATGAGGT-3'   |
| <i>PLCE1ex17</i>  | 5'-CGA GGC TTT ATC TCC AGG TG -3' | 5'-AACAGAGCGAGAACCCG -3'     |
| <i>PLCE1ex19</i>  | 5'-GGCATTGATTGTATGTTTTCTT-3'      | 5'-TAGGCACACTGCCTTTTCAT-3'   |
| <i>LMX1B ex6</i>  | 5'-GCCAGAAGACTACGGTCCAG-3'        | 5'-CTTGGTGGAAGGCTTTTGAG-3'   |
| <i>NPHS2 ex1</i>  | 5'-GCAGCGACTCCACAGGGACT-3'        | 5'-GAACCTGAGCATCCAGCAAT-3'   |
| <i>NPHS2 ex3</i>  | 5'-TCTTATGCCAAGGCCTTTTG-3'        | 5'-CCAATTCTCTCTCTTGGCTACC-3' |
| <i>NPHS2 ex4</i>  | 5'-CCCAGTTTGCTGGGATAATC-3'        | 5'-CCCTAGATTGCCTTTGCACT-3'   |
| <i>NPHS2 ex5</i>  | 5'-GACCTGGTTTGGAATCAACTG-3'       | 5'-GCTATGAGCTCCCAAAGGGA-3'   |
| <i>NPHS2 ex8A</i> | 5'-GTCTCCCCAGCTCAAGACC-3'         | 5'-GGATGGTGCATTGTGACTTC-3'   |

**Supplementary Table 4. Primer Sequences.** Primer sequences used to confirm potentially pathogenic variants identified with next generation sequencing.

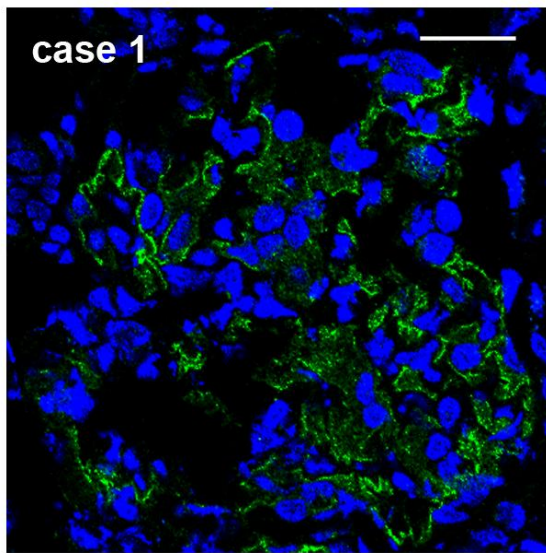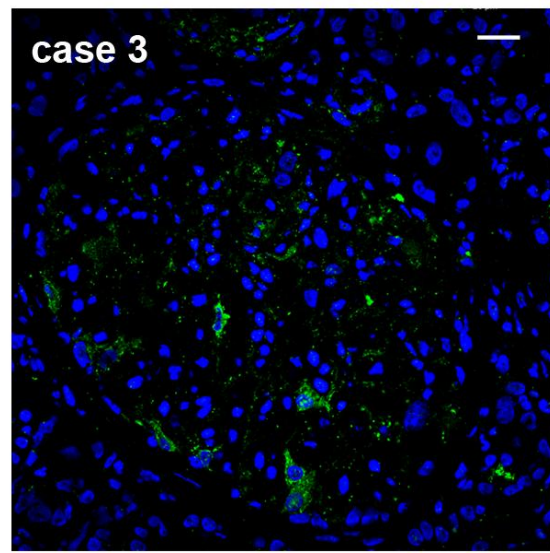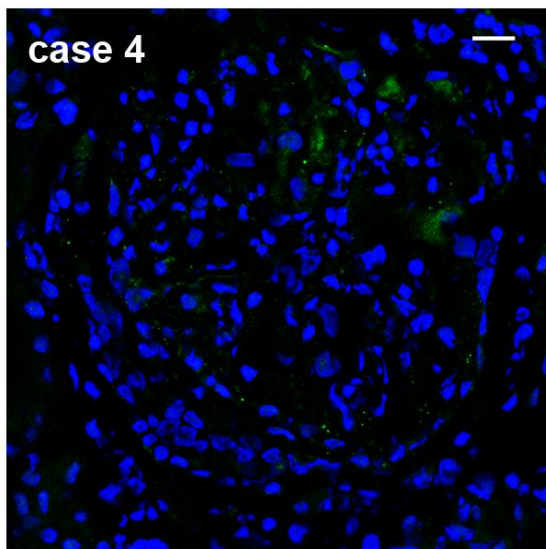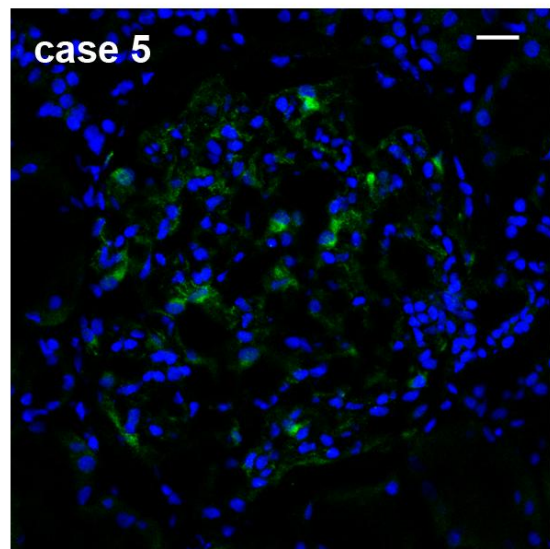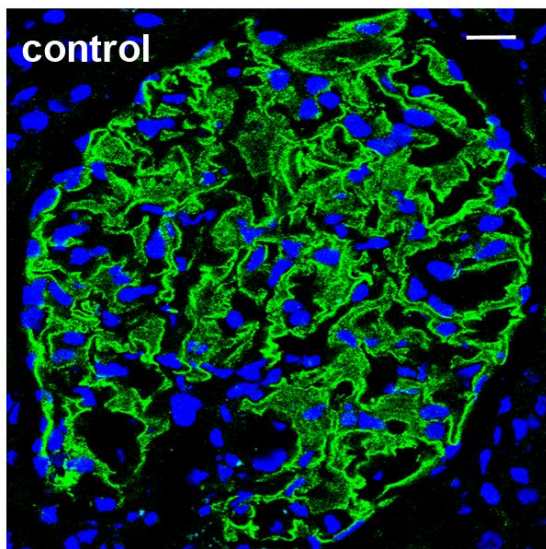

**Supplementary Figure 1. Immunofluorescence staining for podocin on human biopsies of SRNS patients with *NPHS2* mutations.** Representative micrograph of kidney sections stained with podocin (green) on human biopsies of children affected by SRNS with potentially pathogenic variants in *NPHS2* gene, as assessed by confocal microscopy. A healthy glomerulus is shown as a comparison. To-pro-3 counterstains nuclei (blue). Bars 20µm.

|       |                   |                                                                |                  |                                                                 |
|-------|-------------------|----------------------------------------------------------------|------------------|-----------------------------------------------------------------|
| NPHS2 | <b>CASE 5</b>     |                                                                | <b>CASE 6</b>    |                                                                 |
|       | <i>Ser304Phe</i>  |                                                                | <i>Arg548Leu</i> |                                                                 |
|       | Homo              | AKVFNIAAEAKAAASESLRHAAEILSGTPAAVQLRYLHTLQSLSTERPSTVVLPLFPDLL   | Rattus           | LIQFPFEEVASILTEQEQNIIYHRVLPMDVLCFLTRDLSSEPCQRS-LPRLKACISIESILMS |
|       | Danio             | AQVKVIAAEGEKAACEALKASVESVSGSFLVHHLRLQLLHSLRSEQPAPVVLNIPFDVLT   | Mus              | LIQFPFEEVASILTEQEQNIIYHRVLPMDVLCFLTRDLSSEPCQRS-LPRLKASISIESILTS |
|       | Rattus            | AKVKVIAAEGEKAASESLRHAAEILSGTPAAVQLRYLHTLQSLSTDRPSTVVLPLFPDML   | Homo             | LIQFPFEEVASILMEQEQTIIYHRVLPVDVLCFLTRDLGTPFCQRS-LPCLKASISASILT   |
| PLCE1 | <i>Gly1443Arg</i> |                                                                | <i>Val261Glu</i> |                                                                 |
|       | Mus               | ESSHNTYLTGHQIKGESSVELYSQVLLQGCRSIELDCWDGDDGMPIIYHGHILTITKIPFK  | Callithrix       | LIQFPFEEVASILMEQEQTIIYHRVLPVDVLCFLTRDLGTPFCQRS-LPCLKASISASILST  |
|       | Homo              | ESSHNTYLTGHQIKGESSVELYSQVLLQGCRSVELDCWDGDDGMPIIYHGHILTITKIPFK  | Canis            | LIQFPFEEVASILMEQEQNIIYHRVLPVDVLYFLTRDLGTPFCQTP-LPCLKASISASILSS  |
|       | Callithrix        | ESSHNTYLTGHQIKGESSVELYSQVLLQGCRSVELDCWDGDDGMPIIYHGHILTITKIPFK  | Bos              | LIQFPFEEVASILMEQEQNIIYHRVLPVDVLYFLTRDLGTPFCQRS-LPCLKASISASILTS  |
|       | Canis             | ESSHNTYLTGHQIKGESSVELYSQVLLQGCRSVELDCWDGDDGMPIIYHGHILTITKIPFK  | Danio            | LIQFPFEEIATILTEQEQLYHRVFPDLYLSFLTRDLGSPFCHRG-HPHLKASISAPINPT    |
| ACTN4 | <i>Ile155Thr</i>  |                                                                | <i>Ala278Val</i> |                                                                 |
|       | Bos               | ESSHNTYLTGHQIKGESSVELYSQVLLQGCRSVELDCWDGDDGMPVIYHGHILTITKIPFK  | Dicentrarchus    | LVQFPFEEIACILTEQEQLYHRVFPDLYLCFLTRDLGSPFECOTKRHPNLKASLSVFTNPT   |
|       | Danio             | ESSHNTYLTGHQIKGESSVELYSQVLLQGCRSVELDCWDGDDGMPVIYHGHILTITKIPFK  |                  | *;*****;* ** **** ;*;*;*;*** ****,*;.* : * **;* . : : *         |
|       | Dicentrarchus     | ESSHNTYLTGHQIKGESSVELYSQVLLQGCRSVELDCWDGDDGMPVIYHGHILTITKIPFK  |                  |                                                                 |
|       |                   | *****;*****;*****;*****;*****;*****;*****;*****                |                  |                                                                 |
| ACTN4 | <i>LMX1B</i>      |                                                                | <i>LMX1B</i>     |                                                                 |
|       | Homo              | ASKGKVLVSIAGEEIVDGNAMNTLGMWITIIILRFAIQDISVEETSAAKEGLLLWCQRKTAP | Canis            | SSKPCRKVRETLLAAETGLSVRVVQVVFQNGRAKMKKLAPRHQQQQEQQNSQR-----      |
|       | Callithrix        | ASKGKVLVSIAGEEIVDGNAMNTLGMWITIIILRFAIQDISVEETSAAKEGLLLWCQRKTAP | Sus              | SSKPCRKVRETLLAAETGLSVRVVQVVFQNGRAKMKKLAPRHQQQQEQQNSQR-----      |
|       | Bos               | ASKGKVLVSIAGEEIVDGNAMNTLGMWITIIILRFAIQDISVEETSAAKEGLLLWCQRKTAP | Homo             | SSKPCRKVRETLLAAETGLSVRVVQVVFQNGRAKMKKLAPRHQQQQEQQNSQ---FLQGE    |
|       | Rattus            | ASKGKVLVSIAGEEIVDGNAMNTLGMWITIIILRFAIQDISVEETSAAKEGLLLWCQRKTAP | Macaca           | SSKPCRKVRETLLAAETGLSVRVVQVVFQNGRAKMKKLAPRHQQQQEQQNSQ---FLG---   |
| LMX1B | <i>LMX1B</i>      |                                                                | <i>LMX1B</i>     |                                                                 |
|       | Mus               | ASKGKVLVSIAGEEIVDGNAMNTLGMWITIIILRFAIQDISVEETSAAKEGLLLWCQRKTAP | Mus              | SSKPCRKVRETLLAAETGLSVRVVQVVFQNGRAKMKKLAPRHQQQQEQQNSQLG-----     |
|       | Gallus            | ASKGVNVVSIAGEEIVDGNAMNTLGMWITIIILRFAIQDISVEETSAAKEGLLLWCQRKTAP | Xenopus          | SSKPCRKVRETLLAAETGLSVRVVQVVFQNGRAKIKKLAPRHQQQQEQQNSQR-----      |
|       | Danio             | ASKGKVLVSIAGEEIVDGNAMNTLGMWITIIILRFAIQDISVEETSAAKEGLLLWCQRKTAP | Danio            | SSKPCRKVRETLLAAETGLSVRVVQVVFQNGRAKMKKLAPRHQQQQEQQNSQR-----      |
|       | Xenopus           | ASKGKVLVSIAGEEIVDGNAMNTLGMWITIIILRFAIQDISVEETSAAKEGLLLWCQRKTAP |                  | *****;*****;*****;*****;*****;*****;*****;*****                 |

Supplementary Figure 2. Comparison of the aminoacidic sequences of all newly identified variants (*NPHS2*, *PLCE1*, *ACTN4* and *LMX1B*) with those of phylogenetically distant species, illustrating the degree of conservation of the altered amino acid residue.

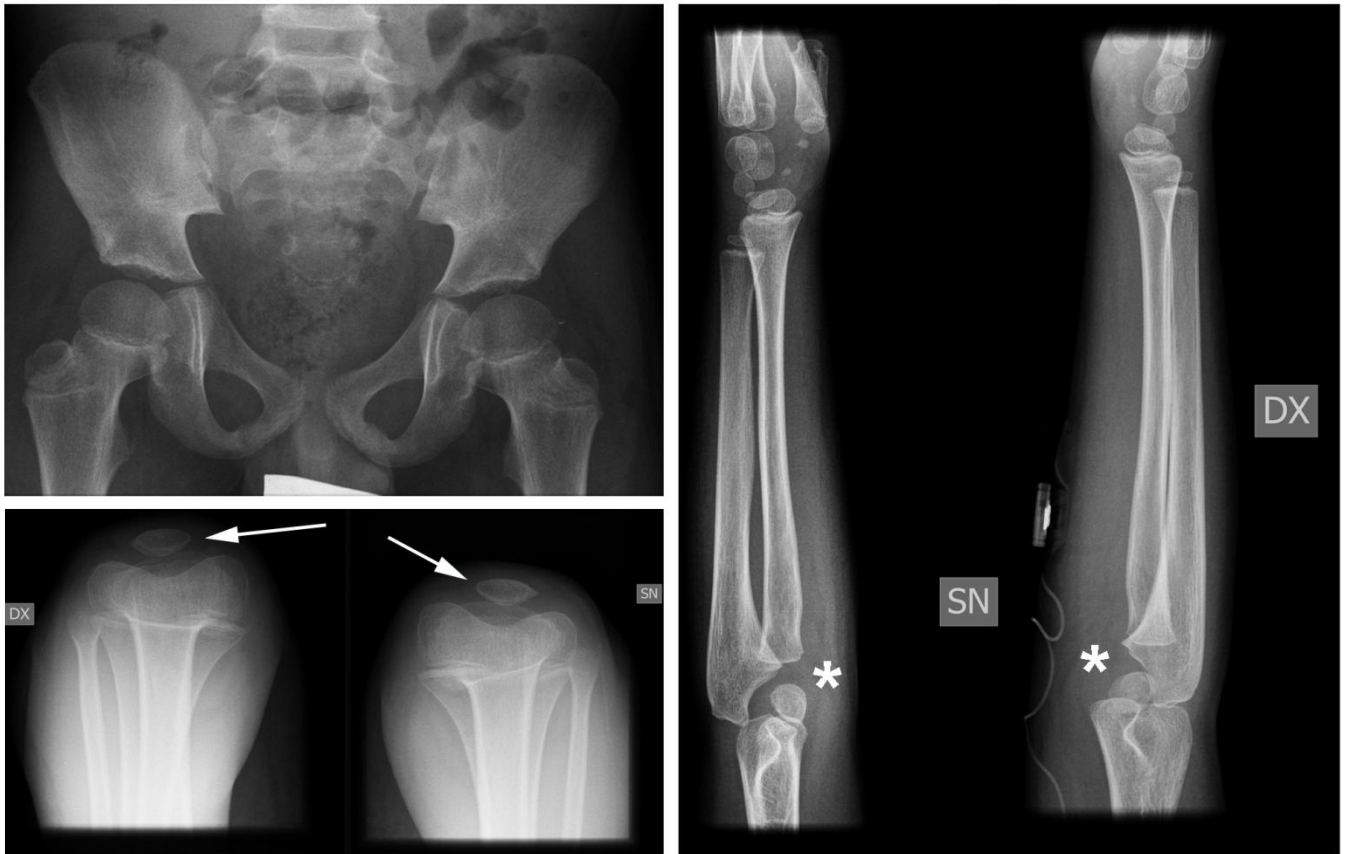

**Supplementary Figure 3. X-ray exams of patients with *LMX1B* mutation (case 10).** Radiologic examinations showing lack of iliac horns (upper left), bilateral normal kneecaps (down left, arrows) and bilateral lack of ossification of the proximal radial epiphysis (\*).

## Supplementary bibliography

1. KDIGO Clinical Practice Guideline for Glomerulonephritis. <http://www.kdigo.org>. June 2012
2. McCarthy HJ, Bierzynska A, Wherlock M, Ognjanovic M, Kerecuk L, Hegde S, Feather S, Gilbert RD, Krischock L, Jones C, Sinha MD, Webb NJ, Christian M, Williams MM, Marks S, Koziell A, Welsh GI, Saleem MA e Group, RADAR the UK SRNS Study. Simultaneous sequencing of 24 genes associated with steroid-resistant nephrotic syndrome. *Clin J Am Soc Nephrol* 8: 637-648, 2013
3. Bell CJ, Dinwiddie DL, Miller NA, Hateley SL, Ganusova EE, Mudge J, Langley RJ, Zhang L, Lee CC, Schilkey FD, Sheth V, Woodward JE, Peckham HE, Schroth GP, Kim RW, Kingsmore SF. Carrier testing for severe childhood recessive diseases by next-generation sequencing. *Sci Transl Med*, 3:65ra4, 2011
4. Richards CS, Bale S, Bellissimo DB, Das S, Grody WW, Hegde MR, Lyon E, Ward BE e Committee, Molecular Subcommittee of the ACMG Laboratory Quality Assurance. ACMG recommendations for standards for interpretation and reporting of sequence variations: Revisions 2007. *Genet Med*, 10: 294-300, 2008
5. Yang Y, Muzny DM, Reid JG, Bainbridge MN, Willis A, Ward PA, Braxton A, Beuten J, Xia F, Niu Z, Hardison M, Person R, Bekheirnia MR, Leduc MS, Kirby A, Pham P, Scull J, Wang M, Ding Y, Plon SE, Lupski JR, Beaudet AL, Gibbs RA, Eng CM. Clinical whole-exome sequencing for the diagnosis of mendelian disorders. *N Engl J Med* 369: 1502-1511, 2013
6. Jacob HJ. Next-generation sequencing for clinical diagnostics. *N Engl J Med* 369: 1557-1558, 2013
7. Angelotti ML<sup>1</sup>, Ronconi E, Ballerini L, Peired A, Mazzinghi B, Sagrinati C, Parente E, Gacci M, Carini M, Rotondi M, Fogo AB, Lazzeri E, Lasagni L, Romagnani P. Characterization of renal progenitors committed toward tubular lineage and their regenerative potential in renal tubular injury. *Stem Cells* 30: 1714-1725, 2012
8. Mucha B, Ozaltin F, Hinkes BG, Hasselbacher K, Ruf RG, Schultheiss M, Hangan D, Hoskins BE, Everding AS, Bogdanovic R, Seeman T, Hoppe B, Hildebrandt F: Mucha B, Ozaltin F, Hinkes BG: Mutations in the Wilms' tumor 1 gene cause isolated steroid resistant nephrotic syndrome and occur in exons 8 and 9. *Pediatr Res* 59: 325–331, 2006

9. Dreyer SD, Zhou G, Baldini A, Winterpacht A, Zabel B, Cole W, Johnson RL, Lee B: Mutations in *LMX1B* cause abnormal skeletal patterning and renal dysplasia in nail patella syndrome. *Nat Genet* 19: 47–50, 1998
10. Chen H, Lun Y, Ovchinnikov D, Kokubo H, Oberg KC, Pepicelli CV, Gan L, Lee B, Johnson RL: Limb and kidney defects in *Lmx1b* mutant mice suggest an involvement of *LMX1B* in human nail patella syndrome. *Nat Genet* 19: 51–55, 1998
11. Philippe A, Nevo F, Esquivel EL, Reklaityte D, Gribouval O, Tête MJ, Loirat C, Dantal J, Fischbach M, Pouteil-Noble C, Decramer S, Hoehne M, Benzing T, Charbit M, Niaudet P, Antignac C: Nephtrin mutations can cause childhood-onset steroid-resistant nephrotic syndrome. *J Am Soc Nephrol* 19: 1871-1878, 2008
12. Boute N, Gribouval O, Roselli S, Benessy F, Lee H, Fuchshuber A, Dahan K, Gubler MC, Niaudet P, Antignac C: *NPHS2*, encoding the glomerular protein podocin, is mutated in autosomal recessive steroid-resistant nephrotic syndrome. *Nat Genet* 24:349–354, 2000
13. Gigante M, Pontrelli P, Montemurno E, Roca L, Aucella F, Penza R, Caridi G, Ranieri E, Ghiggeri GM, Gesualdo L: *CD2AP* mutations are associated with sporadic nephrotic syndrome and focal segmental glomerulosclerosis (FSGS). *Nephrol Dial Transplant* 24: 1858–1864, 2009
14. Kaplan JM, Kim SH, North KN, Rennke H, Correia LA, Tong HQ, Mathis BJ, Rodríguez-Pérez JC, Allen PG, Beggs AH, Pollak MR: Mutations in *ACTN4*, encoding alpha-actinin-4, cause familial focal segmental glomerulosclerosis. *Nat Genet* 24:251-256 2000
15. Weins A, Kenlan P, Herbert S, Le TC, Villegas I, Kaplan BS, Appel GB, Pollak MR: Mutational and Biological Analysis of alpha-actinin-4 in focal segmental glomerulosclerosis. *J Am Soc Nephrol* 16:3694-36701 2005
16. Brown EJ, Schlondorff JS, Becker DJ, Tsukaguchi H, Tonna SJ, Uscinski AL, Higgs HN, Henderson JM, Pollak MR: Mutations in the formin gene *INF2* cause focal segmental glomerulosclerosis. *Nat Genet* 42:72–77, 2010
17. Nicolaou N, Margadant C, Kevelam SH, Lilien MR, Oosterveld MJ, Kreft M, van Eerde AM, Pfundt R, Terhal PA, van der Zwaag B, Nikkels PG, Sachs N, Goldschmeding R, Knoers NV, Renkema KY, Sonnenberg A: Gain of glycosylation in integrin  $\alpha 3$  causes lung disease and nephrotic syndrome. *J Clin Invest* 122: 4375-4387, 2012

18. Winn MP, Conlon PJ, Lynn KL, Farrington MK, Creazzo T, Hawkins AF, Daskalakis N, Kwan SY, Ebersviller S, Burchette JL, Pericak-Vance MA, Howell DN, Vance JM, Rosenberg PB: A mutation in the TRPC6 cation channel causes familial focal segmental glomerulosclerosis. *Science* 308:1801–1804, 2005
19. Zenker M, Aigner T, Wendler O, Tralau T, Muntefering H, Fenski R, Pitz S, Schumacher V, Royer-Pokora B, Wuhl E, Cochat P, Bouvier R, Kraus C, Mark K, Madlon H, Dotsch J, Rascher W, Maruniak-Chudek I, Lennert T, Neumann LM, Reis A: Human laminin beta2 deficiency causes congenital nephrosis with mesangial sclerosis and distinct eye abnormalities. *Hum Mol Genet* 13: 2625–2632, 2004
20. Hinkes B, Wiggins RC, Gbadegesin R, Vlangos CN, Seelow D, Nurnberg G, Garg P, Verma R, Chaib H, Hoskins BE, Ashraf S, Becker C, Hennies HC, Goyal M, Wharram BL, Schachter AD, Mudumana S, Drummond I, Kerjaschki D, Waldherr R, Dietrich A, Ozaltin F, Bakkaloglu A, Cleper R, Basel-Vanagaite L, Pohl M, Griebel M, Tsygin AN, Soylu A, Muller D, Sorli CS, Bunney TD, Katan M, Liu J, Attanasio M, O'Toole JF, Hasselbacher K, Mucha B, Otto EA, Airik R, Kispert A, Kelley GG, Smrcka AV, Gudermann T, Holzman LB, Nurnberg P, Hildebrandt F: Positional cloning uncovers mutations in PLCE1 responsible for a nephrotic syndrome variant that may be reversible. *Nat Genet* 38: 1397–1405, 2006
21. Berkovic SF, Dibbens LM, Oshlack A, Silver JD, Katerelos M, Vears DF, Lullmann-Rauch R, Blanz J, Zhang KW, Stankovich J, Kalnins RM, Dowling JP, Andermann E, Andermann F, Faldini E, D'Hooge R, Vadlamudi L, Macdonell RA, Hodgson BL, Bayly MA, Savige J, Mulley JC, Smyth GK, Power DA, Saftig P, Bahlo M: Array-based gene discovery with three unrelated subjects shows SCARB2/LIMP-2 deficiency causes myoclonus epilepsy and glomerulosclerosis. *Am J Hum Genet* 82: 673–684, 2008
22. Diomedi-Camassei F, Di Giandomenico S, Santorelli FM, Caridi G, Piemonte F, Montini G, Ghiggeri GM, Murer L, Barisoni L, Pastore A, Muda AO, Valente ML, Bertini E, Emma F: COQ2 nephropathy: a newly described inherited mitochondriopathy with primary renal involvement. *J Am Soc Nephrol* 18: 2773–2780, 2007
23. Lopez LC, Schuelke M, Quinzii CM, Kanki T, Rodenburg RJ, Naini A, Dimauro S, Hirano M: Leigh syndrome with nephropathy and CoQ10 deficiency due to decaprenyl diphosphate synthase subunit 2 (PDSS2) mutations. *Am J Hum Genet* 79: 1125–1129, 2006

24. Boerkoel CF, Takashima H, John J, Yan J, Stankiewicz P, Rosenbarker L, Andre JL, Bogdanovic R, Burguet A, Cockfield S, Cordeiro I, Frund S, Illies F, Joseph M, Kaitila I, Lama G, Loirat C, McLeod DR, Milford DV, Petty EM, Rodrigo F, Saraiva JM, Schmidt B, Smith GC, Spranger J, Stein A, Thiele H, Tizard J, Weksberg R, Lupski JR, Stockton DW: Mutant chromatin remodeling protein SMARCA1 causes Schimke immuno-osseous dysplasia. *Nat Genet* 30: 215–220, 2002
25. Agarwal AK, Zhou XJ, Hall RK, Nicholls K, Bankier A, Van Esch H, Fryns JP, Garg A: Focal segmental glomerulosclerosis in patients with mandibuloacral dysplasia owing to ZMPSTE24 deficiency. *J Invest Med* 54:208–213, 2006
26. Kopp JB, Smith MW, Nelson GW, Johnson RC, Freedman BI, Bowden DW, Oleksyk T, McKenzie LM, Kajiyama H, Ahuja TS, Berns JS, Briggs W, Cho ME, Dart RA, Kimmel PL, Korbet SM, Michel DM, Mokrzycki MH, Schelling JR, Simon E, Trachtman H, Vlahov D, Winkler CA: MYH9 is a major-effect risk gene for focal segmental glomerulosclerosis. *Nat Genet* 40: 1175–1184, 2008
27. Ozaltin F, Ibsirlioglu T, Taskiran EZ, Baydar DE, Kaymaz F, Buyukcelik M, Kilic BD, Balat A, Iatropoulos P, Asan E, Akarsu NA, Schaefer F, Yilmaz E, Bakkaloglu A: Disruption of PTPRO causes childhood-onset nephrotic syndrome. *Am J Hum Genet* 89:139–147, 2011
28. Mele C, Iatropoulos P, Donadelli R, Calabria A, Maranta R, Cassis P, Buelli S, Tomasoni S, Piras R, Krendel M, Bettoni S, Morigi M, Delledonne M, Pecoraro C, Abbate I, Capobianchi MR, Hildebrandt F, Otto E, Schaefer F, Macciardi F, Ozaltin F, Emre S, Ibsirlioglu T, Benigni A, Remuzzi G, Noris M: MYO1E mutations and childhood familial focal segmental glomerulosclerosis. *N Engl J Med* 365: 295–306, 2011
29. Srichai MB, Konieczkowski M, Padiyar A, Konieczkowski DJ, Mukherjee A, Hayden PS, Kamat S, El-Meanawy MA, Khan S, Mundel P, Lee SB, Bruggeman LA, Schelling JR, Sedor JR: A WT1 co-regulator controls podocyte phenotype by shuttling between adhesion structures and nucleus. *J Biol Chem* 279: 14398–14408, 2004
30. Green LM, Wagner KJ, Campbell HA, Addison K, Roberts SG: Dynamic interaction between WT1 and BASP1 in transcriptional regulation during differentiation. *Nucleic Acids Res* 37: 431–440, 2009
31. Wagner KD, Wagner N, Guo JK, Elger M, Dallman MJ, Bugeon L, Schedl A: An inducible mouse model for PAX2-dependent glomerular disease: insights into a complex pathogenesis. *Curr Biol* 16: 793–800, 2006

32. Suleiman H, Heudobler D, Raschta AS, Zhao Y, Zhao Q, Hertting I, Vitzthum H, Moeller MJ, Holzman LB, Rachel R, Johnson R, Westphal H, Rascle A, Witzgall R: The podocyte-specific inactivation of *Lmx1b*, *Ldb1* and *E2a* yields new insight into a transcriptional network in podocytes. *Dev Biol* 304: 701-712, 2007
33. Quaggin SE, Schwartz L, Cui S, Igarashi P, Deimling J, Post M, Rossant J: The basic-helix-loop-helix protein *pod1* is critically important for kidney and lung organogenesis. *Development* 126: 5771-5783, 1999
34. Cui S, Li C, Ema M, Weinstein J, Quaggin SE: Rapid isolation of glomeruli coupled with gene expression profiling identifies downstream targets in *Pod1* knockout mice. *J Am Soc Nephrol* 16: 3247-3255, 2005
35. Moriguchi T, Hamada M, Morito N, Terunuma T, Hasegawa K, Zhang C, Yokomizo T, Esaki R, Kuroda E, Yoh K, Kudo T, Nagata M, Greaves DR, Engel JD, Yamamoto M, Takahashi S: *MafB* is essential for renal development and *F4/80* expression in macrophages. *Mol Cell Biol.* 26: 5715-5727, 2006
36. Takemoto M, He L, Norlin J, Patrakka J, Xiao Z, Petrova T, Bondjers C, Asp J, Wallgard E, Sun Y, Samuelsson T, Mostad P, Lundin S, Miura N, Sado Y, Alitalo K, Quaggin SE, Tryggvason K, Betsholtz C: Large-scale identification of genes implicated in kidney glomerulus development and function. *EMBO J* 25: 1160-1174, 2006
37. Rascle A, Suleiman H, Neumann T, Witzgall R: Role of transcription factors in podocytes. *Nephron Exp Nephrol* 106: e60-66, 2007
38. Chugh SS: Transcriptional regulation of podocyte disease. *Transl Res* 149: 237-242, 2007
39. Schiffer M, Bitzer M, Roberts IS, Kopp JB, ten Dijke P, Mundel P, Böttinger EP: Apoptosis in podocytes induced by TGF-beta and *Smad7*. *J Clin Invest* 108: 807-816, 2001
40. Liu G, Clement LC, Kanwar YS, Avila-Casado C, Chugh SS: *ZHX* proteins regulate podocyte gene expression during the development of nephrotic syndrome. *J Biol Chem* 281: 39681-39692, 2006
41. Niranjana T, Bielez B, Gruenwald A, Ponda MP, Kopp JB, Thomas DB, Susztak K: The Notch pathway in podocytes plays a role in the development of glomerular disease. *Nat Med* 14: 290-298, 2008
42. Asanuma K., Kim K., Oh J., Giardino L., Chabanis S., Faul C., Reiser J., Mundel P: Synaptopodin regulates the actin-bundling activity of alpha-actinin in an isoform-specific manner. *J. Clin. Invest* 115: 1188-1198, 2005

43. Mykkänen OM, Grönholm M, Rönty M, Lalowski M, Salmikangas P, Suila H, Carpén O: Characterization of human palladin, a microfilament-associated protein. *Mol Biol Cell* 12: 3060-3073, 2001
44. Zhang XA., Hemler ME: Interaction of the integrin beta1 cytoplasmic domain with ICAP-1 protein. *J. Biol. Chem.* 274: 11-19, 1999
45. Chang DD., Hoang BQ., Liu J., Springer TAJ: Molecular basis for interaction between Icap1alpha PTB domain and beta 1 integrin." *Biol. Chem* 277: 8140-8145, 2002
46. Sever S, Altintas MM, Nankoe SR, Moller CC, Ko D, Wei C, Henderson J, del Re E C, Hsing L, Erickson A, Cohen CD, Kretzler M, Kerjaschki D, Rudensky A, Nikolic B, Reiser J: Proteolytic processing of dynamin by cytoplasmic cathepsin L is a mechanism for proteinuric kidney disease. *J. Clin. Invest* 117: 2095-2104, 2007
47. Donoviel DB, Freed DD, Vogel H, Potter DG, Hawkins E, Barrish JP, Mathur BN, Turner CA, Geske R, Montgomery CA, Starbuck M, Brandt M, Gupta A, Ramirez-Solis R, Zambrowicz BP, Powell DR: Proteinuria and perinatal lethality in mice lacking NEPH1, a novel protein with homology to NEPHRIN. *Mol Cell Biol* 21: 4829-4836, 2001
48. Sellin L, Huber TB, Gerke P, Quack I, Pavenstädt H, Walz G: NEPH1 defines a novel family of podocin interacting proteins. *FASEB J* 17: 115-117, 2003
49. Takeda T, McQuistan T, Orlando RA, Farquhar MG: Loss of glomerular foot processes is associated with uncoupling of podocalyxin from the actin cytoskeleton. *J Clin Invest* 108: 289-301, 2001
50. Barros MH, Johnson A, Gin P, Marbois BN, Clarke CF, Tzagoloff A: The *Saccharomyces cerevisiae* COQ10 gene encodes a START domain protein required for function of coenzyme Q in respiration. *J. Biol. Chem* 280: 42627-42635, 2005
51. Karamatic Crew V, Burton N, Kagan A, Green CA, Levene C, Flinter F, Brady RL, Daniels G, Anstee D J: CD151, the first member of the tetraspanin (TM4) superfamily detected on erythrocytes, is essential for the correct assembly of human basement membranes in kidney and skin. *Blood* 104: 2217-2223, 2004
52. Imachi H, Murao K, Ohtsuka S, Fujiwara M, Muraoka T, Hosokawa H, Ishida T: A case of Dunnigan-type familial partial lipodystrophy (FPLD) due to lamin A/C (LMNA) mutations complicated by end-stage renal disease. *Endocrine* 35: 18-21, 2009

53. Niranjana T, Bielecki B, Gruenewald A, Ponda MP, Kopp JB, Thomas DB, Susztak K: The Notch pathway in podocytes plays a role in the development of glomerular disease. *Nat Med* 14: 290-298, 2008
